# Supplementary material
Source: publisher site journal article supplement (https://www.dovepress.com/article/597466)

| Category | Pathogen | Reads | Coverage | Relative abundance | Confidence level |
| --- | --- | --- | --- | --- | --- |
| Bacteria | - | - | - | - | - |
| Fungi | *Candida auris* | 2,649 | 1.1% | 94.2% | 99% |
|  | *Candida albicans* | 103 | 0.1% | 3.5% | 99% |
|  | *Cryptococcus neoformans* | 8 | 0.1% | 0.2% | 99% |

Supplementary Table 1

List of pathogens detected in bronchoalveolar lavage fluid of the patient by metagenomic next-generation sequencing (mNGS)

The following is the original image of the report.


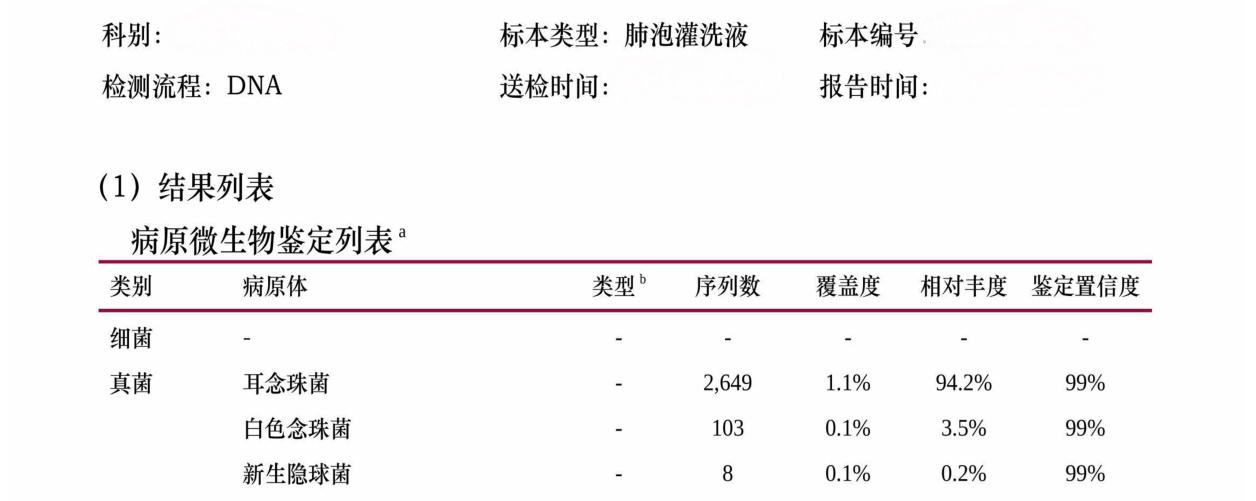

Supplement: Supplementary file 1 [file Supplementary%20Table%201.docx]
